# Supplementary material
Source: PubMed Central journal article supplement (PMC1820717)

A

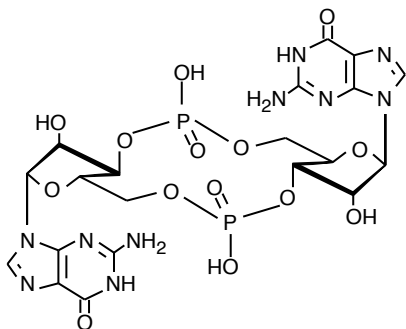

B

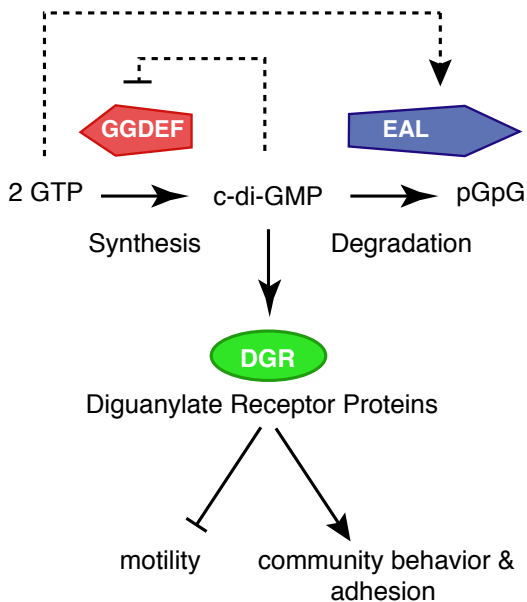

Supplement: pnas_0607738104_1.pdf [file pnas_0607738104_1.pdf]

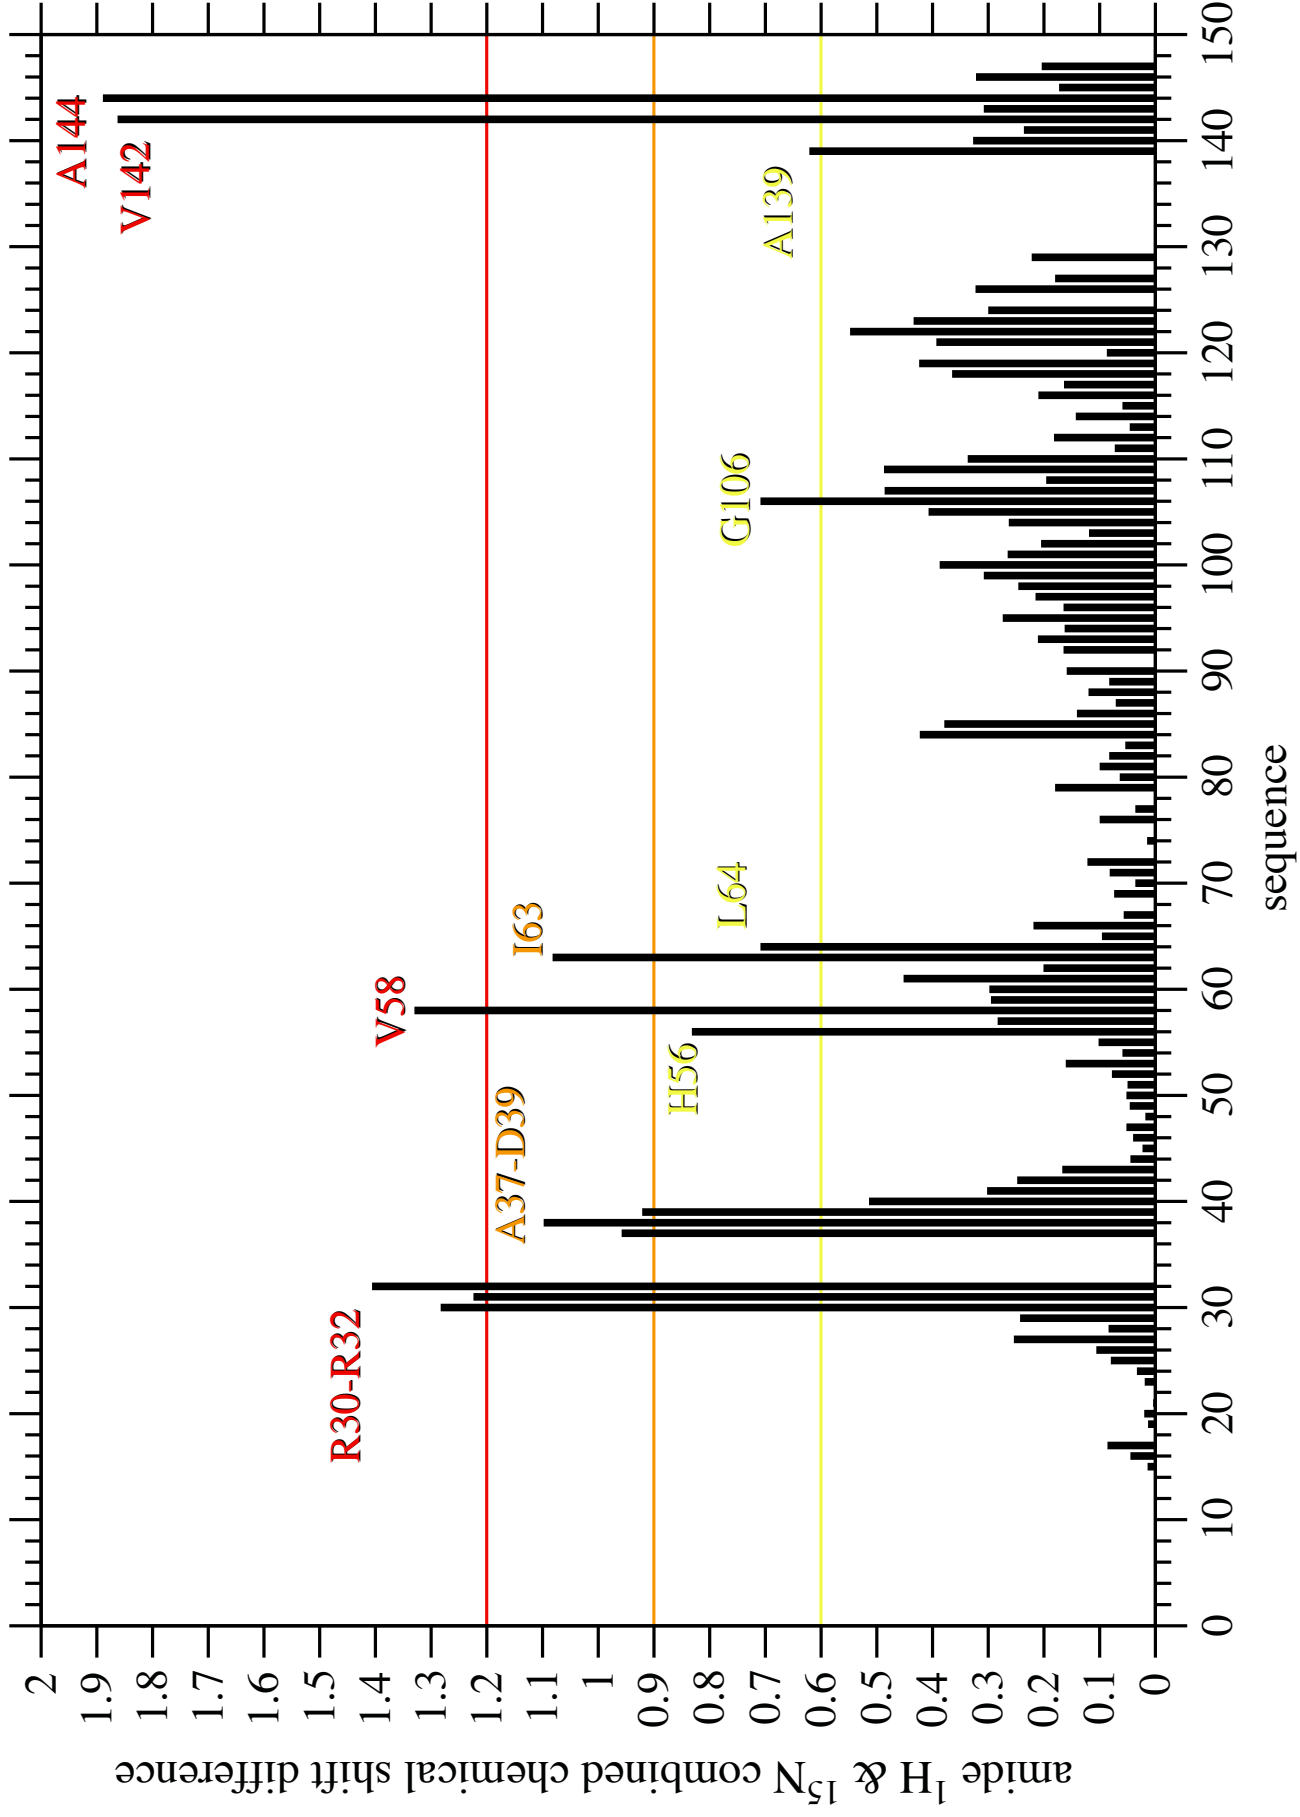

Supplement: pnas_0607738104_2.pdf [file pnas_0607738104_2.pdf]

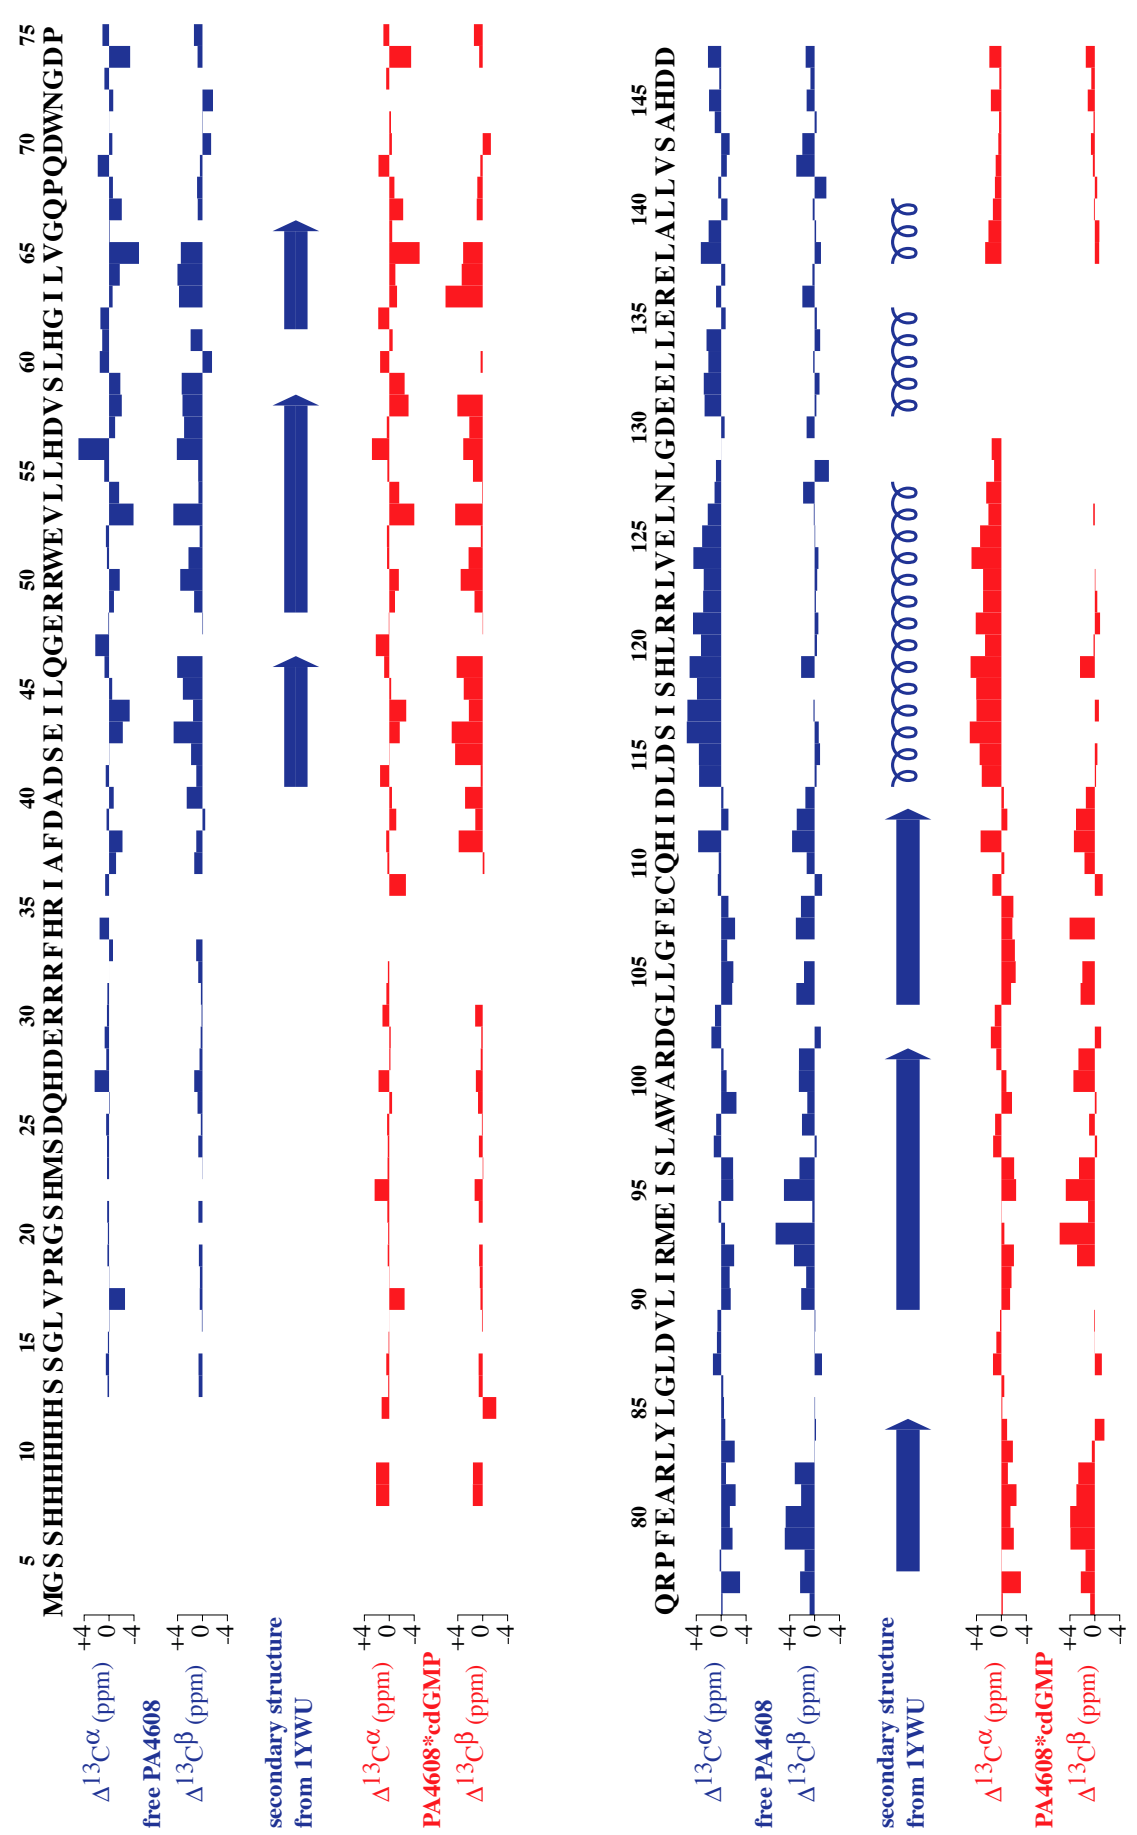

Supplement: pnas_0607738104_3.pdf [file pnas_0607738104_3.pdf]

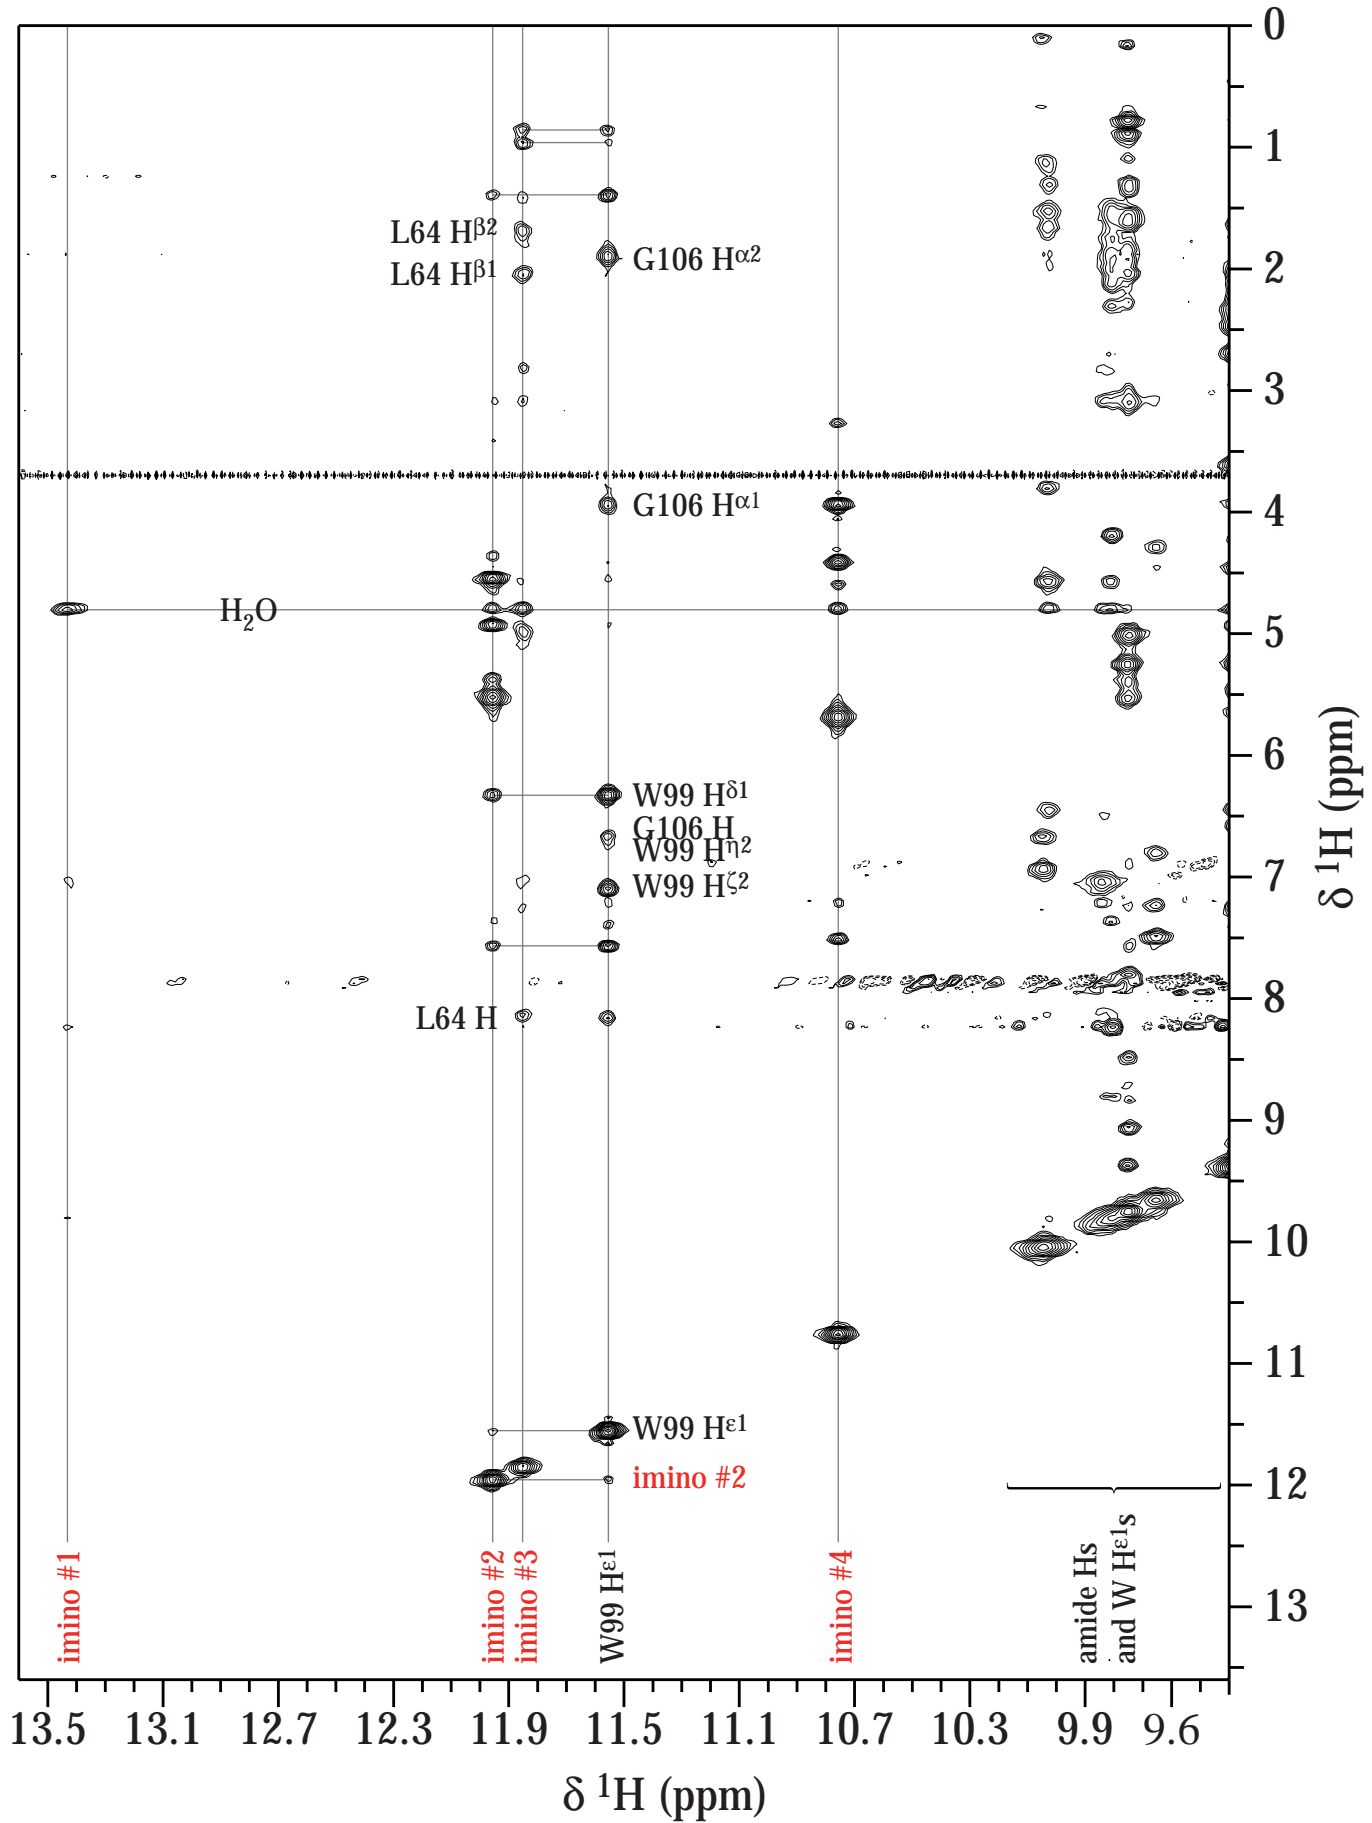

Supplement: pnas_0607738104_4.pdf [file pnas_0607738104_4.pdf]
